# 1 Rapid mechanical stimulation of 2 inner-ear hair cells by photonic 3 pressure

4 Sanjeewa Abeytunge<sup>1,2</sup>, Francesco Gianoli<sup>1</sup>, A.J. Hudspeth<sup>2†</sup>, & Andrei S. Kozlov<sup>1†</sup>

**\*For correspondence:**

[a.kozlov@imperial.ac.uk](mailto:a.kozlov@imperial.ac.uk);  
[hudspaj@rockefeller.edu](mailto:hudspaj@rockefeller.edu)

<sup>†</sup>These authors contributed  
equally to this study

5 <sup>1</sup>Laboratory of Auditory Neuroscience and Biophysics, Department of Bioengineering,  
6 Imperial College London, London, U. K.; <sup>2</sup>Howard Hughes Medical Institute and  
7 Laboratory of Sensory Neuroscience, The Rockefeller University, 1230 York Avenue,  
8 New York, New York 10065, U.S.A.

9 

---

10 **Abstract** Hair cells, the receptors of the inner ear, detect sounds by transducing mechanical  
11 vibrations into electrical signals. From the top surface of each hair cell protrudes a mechanical  
12 antenna, the hair bundle, which the cell uses to detect and amplify auditory stimuli, thus  
13 sharpening frequency selectivity and providing a broad dynamic range. Current methods for  
14 mechanically stimulating hair bundles are too slow to encompass the frequency range of  
15 mammalian hearing and are plagued by inconsistencies. To overcome these challenges, we have  
16 developed a method to move individual hair bundles with photonic force. This technique uses an  
17 optical fiber whose tip is tapered to a diameter of a few micrometers and endowed with a ball  
18 lens to minimize divergence of the light beam. Here we describe the fabrication, characterization,  
19 and application of this optical system and demonstrate the rapid application of photonic force to  
20 vestibular and cochlear hair cells.

21 

---

## 22 Introduction

23 Hair cells in the auditory and vestibular systems of vertebrates convert mechanical stimuli into  
24 electrical signals through the process of mechano-electrical transduction (*Hudspeth, 1989*). The  
25 mechanical receptor for such stimuli is the hair bundle, a cluster of stereocilia, or stiff enlarged  
26 microvilli, atop each hair cell. An extracellular molecular filament, the tip link, extends from the tip  
27 of each stereocilium to the side of its tallest neighbor in the plane parallel to the bundle's axis of  
28 symmetry. Mechanically gated ion channels are located at the lower end of each tip link. When a  
29 hair bundle pivots at its base toward its tall edge in response to stimulation, the increased tension  
30 in the tip links opens the ion channels and the ensuing ionic current depolarizes the cell (Fig. 1A).

31 Although our understanding of the transduction process has improved significantly through  
32 the development of methods to mechanically stimulate a hair bundle, the techniques available  
33 nowadays pose serious limitations. Two methods are commonly used to apply force to a hair bun-  
34 dle. The first is to deflect the bundle with a compliant glass fiber about 100  $\mu\text{m}$  in length and 1  $\mu\text{m}$   
35 in diameter (*Crawford and Fettiplace, 1985; Howard and Ashmore, 1986; Howard and Hudspeth,*  
36 *1988*). The fiber's tip is attached to the top of the hair bundle and its base is driven by a piezo-  
37 electric actuator. Because the preparation is immersed in an aqueous solution, however, the fiber  
38 is subjected to hydrodynamic drag that roughly doubles that on the bundle. For a typical fiber  
39 of stiffness 500  $\mu\text{N} \cdot \text{m}^{-1}$  and drag coefficient 150  $\text{nN} \cdot \text{s} \cdot \text{m}^{-1}$ , the time constant of responsiveness  
40 is about 300  $\mu\text{s}$ , which corresponds to a low-pass filter (*Crawford and Fettiplace, 1985; Howard*

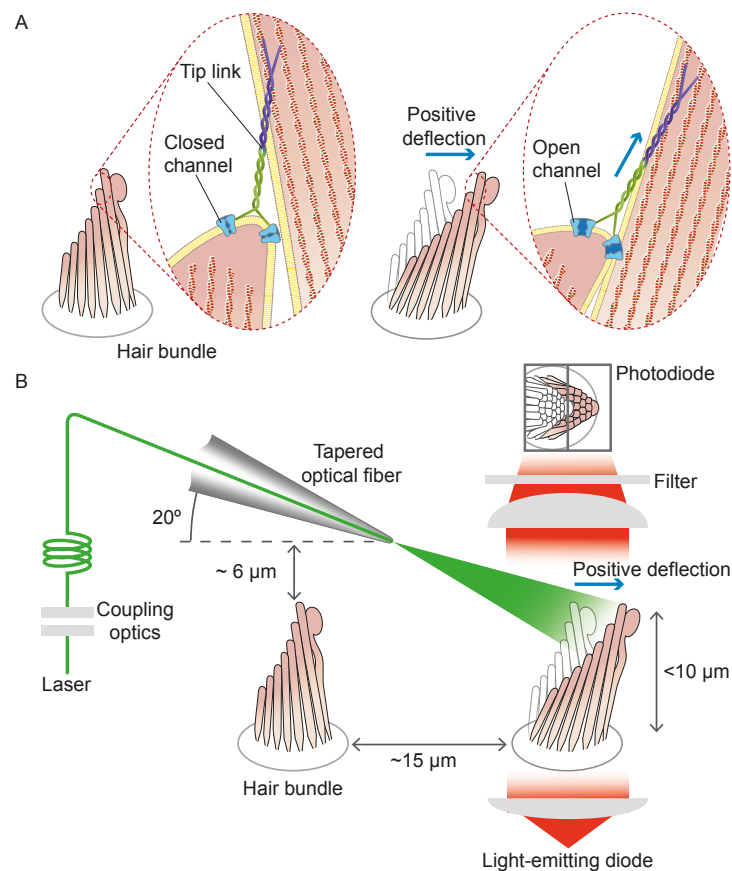

**Figure 1.** Structure of the hair bundle and configuration of the experiments. (A) A schematic illustration portrays a hair bundle, in this instance that from the bullfrog's sacculus, at rest (left) and when deflected towards its tall edge (right). The bundle is formed by rows of stereocilia that increase in height along the axis of sensitivity and are interlinked by molecular filaments, the tip links, that stretch as the bundle moves forward. The tip links project the stimulus force onto mechanosensitive ion channels. (B) A tapered optical fiber with a spherical lens at its tip is brought within a few tens of micrometers of a hair bundle. The fiber's angle of approximately 20° from the horizontal allows it to pass beneath the microscope's objective lens without impinging upon other nearby hair bundles. An image of the hair bundle is projected through the microscope and onto a dual photodiode, which permits measurement of bundle motion with a precision in the nanometer range. Note that the extent of hair-bundle movement in this and the subsequent figures is greatly exaggerated for didactic purposes: the largest displacements move the bundle's top by less than the diameter of a single stereocilium.

41 *and Hudspeth, 1987*) with a cutoff frequency near 500 Hz. Another problem is especially acute for  
42 the stimulation of mammalian hair bundles whose stereocilia are less cohesive than those of am-  
43 phibians: when a fiber is attached at a single site in the hair bundle, the displacement of other  
44 stereocilia depends in a complex manner on elastic and hydrodynamic coupling across the bundle.  
45 This arrangement results in an uneven application of force to different stereocilia and can produce  
46 artifacts (*Indzhuklian et al., 2013; Nam et al., 2015*).

47 The second common method of stimulation uses a fluid jet that displaces a hair bundle through  
48 the action of a piezoelectric diaphragm (*Géléoc et al., 1997; Corns et al., 2014*). Although the reso-  
49 nant frequency of fluid injection can reach 5 kHz, practical use of the method is limited to less than  
50 1 kHz owing to uncertainties in force calibration (*Dinklo et al., 2007*). Moreover, fluid leakage from  
51 the system might introduce a displacement bias.

52 In summary, the inability of current methods to reach higher frequencies by direct stimulation  
53 limits our quantitative understanding of hair-cell mechanics over more than 95% of the range of  
54 mammalian hearing, which extends to 20 kHz in humans and at least 150 kHz in some species of

55 bats and whales. What is more, the susceptibility of current approaches to artifacts has long im-  
56 peded our understanding of hearing, in particular in the case of the mammalian ear (*Nam et al.,*  
57 *2015*).

58 To address these problems, we used laser irradiation to stimulate hair bundles mechanically  
59 (Fig. 1B). Because photonic force arises when photons are absorbed, reflected, or refracted upon  
60 interaction with an object, intense illumination should apply substantial force to a bundle. Our ex-  
61 periments confirmed the validity of the approach and demonstrated that the requisite irradiation  
62 does not jeopardize a bundle's operation. This method allows us to probe hair-bundle physiology  
63 at previously inaccessible timescales, for the delivery time of the stimulus can accommodate the  
64 full frequency range of mammalian hearing. At the same time, this approach avoids the artifacts  
65 that bedevil current methods.

## 66 Results

### 67 Application of photonic force to a hair bundle

68 The conservation of momentum entails that reflected, absorbed, and refracted photons exert force  
69 on a target. All these phenomena are likely to take place when light strikes an array of stereocilia  
70 in a hair bundle. Although an analysis based on reflection alone would indicate that a hair bundle is  
71 relatively insensitive to radiation pressure, geometric considerations favor multiple modes of light  
72 propagation, each capable of transferring momentum and therefore of mechanically stimulating  
73 the bundle (see *Materials and methods*). Because the diameter of each stereocilium compares to  
74 the wavelength of light, the regular spacing of stereocilia within the hair bundle might additionally  
75 give rise to complex interference patterns.

### 76 Structure and orientation of an optical fiber

77 Geometrical factors are important in the stimulation of a hair bundle through an optical fiber. With  
78 its external plastic jacket, an intact fiber can be several millimeters in diameter. Even after the jacket  
79 has been removed, the core of the fiber—which is only 5  $\mu\text{m}$  in diameter—lies within a cylinder of  
80 glass cladding about 125  $\mu\text{m}$  across. In order to bring the fiber's core near a hair bundle without  
81 impingement of the fiber's outer layers on the experimental preparation, it was necessary to strip  
82 the jacket and taper the cladding. By melting the tip of the fiber's core, we created a hemispherical  
83 lens with a divergence angle in water of approximately 11° (see *Materials and methods*).

84 It was next desirable for the light beam to stimulate only a single hair bundle without affecting  
85 others nearby. This objective could be achieved readily for a flat sensory epithelium such as that of  
86 the bullfrog's sacculus, in which the bundles are about 8  $\mu\text{m}$  tall and are separated by approximately  
87 15  $\mu\text{m}$  (see Fig. 1). In the rat's cochlea, however, the distance between the row of inner hair cells  
88 and the first row of outer hair cells is only 10  $\mu\text{m}$ , and successive rows of outer hair cells are still  
89 more closely apposed. Moreover, this preparation is complicated by the complex curvature of its  
90 apical surface, the reticular lamina, which allows greater clearance for an optical fiber in some  
91 orientations than in others. After securing the end of a tapered optical fiber in a stable holder, we  
92 found that introducing it beneath the objective lens at an angle of 20° from the horizontal allowed  
93 the tip to approach a target hair bundle closely enough to ensure efficient stimulation, and at  
94 the same time positioned the tip far enough above other bundles to avoid damaging them (see  
95 *Materials and methods*).

### 96 Deflection of glass rods by photonic force

97 Before engaging in experiments with hair bundles, we conducted control experiments to confirm  
98 that photonic force from a tapered optical fiber could move an object of stiffness comparable to  
99 that of a bundle. We thinned two glass rods with a pipette puller and measured the stiffness of each  
100 by analyzing the spectrum of its Brownian motion and applying the equipartition theorem. After  
101 positioning each rod such that its shadow projected onto the photodiode, we delivered light pulses  
102 through a tapered optical fiber positioned approximately 10  $\mu\text{m}$  from the rod's tip. In both cases,

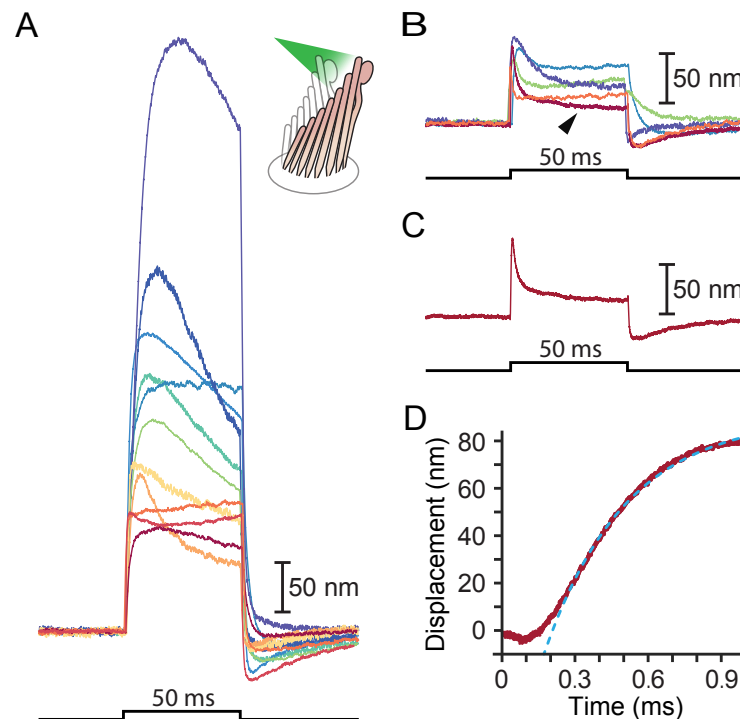

**Figure 2.** Responses of hair bundles from the bullfrog's sacculus. (A) Although all hair bundles displayed rapid movements at the onset and conclusion of photonic stimulation, some exhibited relatively slow approaches to their peaks and slow relaxations. Eleven hair bundles were stimulated in the positive direction with 561 nm light with 30 mW at the fiber's entrance; each trace is the average of 25 responses. The schematic diagram here and in the subsequent figures shows the experimental configuration. (B) Five of the other hair bundles displayed moved rapidly at the onset of irradiation, then relaxed to plateau displacements. (C) A representative trace, marked by an arrowhead in panel B, portrays the decay of a response to a plateau level and the undershoot after stimulation characteristic of slow adaptation. (D) The rising phase of the same response is fitted with  $R^2 = 0.98$  to an exponential with time constant  $335 \mu\text{s}$  (dashed blue line). The data at times below  $250 \mu\text{s}$  were not included in the fit.

103 we found that irradiation elicited a prompt movement in the expected direction (see **Appendix 1**  
104 Fig. 2). Having ascertained that our setup could deliver forces of an appropriate order of magnitude,  
105 we commenced experiments on living hair bundles.

### 106 **Stimulation of frog hair bundles**

107 We stimulated 40 hair bundles of the bullfrog's sacculus so that radiation pressure would push  
108 them toward their tall edges—the positive direction—and reliably elicited the expected movements  
109 (Fig. 2). The bundles followed similar trajectories at the onset of irradiation: the movement was  
110 approximately exponential with a time constant of  $(0.64 \pm 0.06) \text{ ms}$  (mean  $\pm$  SEM,  $N = 16$ ). The re-  
111 sponses, which reached displacements as great as 500 nm, encompassed the range of complex tra-  
112 jectories reported in the literature. The relatively compliant hair bundles—those displaying initial  
113 deflections exceeding about 150 nm—displayed relatively slow movements in the direction of the  
114 photonic force, a signature of the timescale of the adaptation process that allows hair cells to reset  
115 their operating points and thus detect successive stimuli (Fig. 2A) (Ricci et al., 2000). The “twitch,”  
116 a faster rebound of the hair bundle in a direction opposite to that of the stimulus, is another man-  
117 ifestation of the adaptation process that occurs instead in response to smaller movements of the  
118 hair bundle and whose magnitude decreases for larger deflections (Ricci et al., 2000; Benser et al.,  
119 1996; Cheung and Corey, 2006). The twitch was indeed observed in stiffer bundles with deflec-  
120 tions of about 50 nm (Fig. 2B–D). These results indicate that photonic force is an effective means of  
121 stimulating hair bundles.

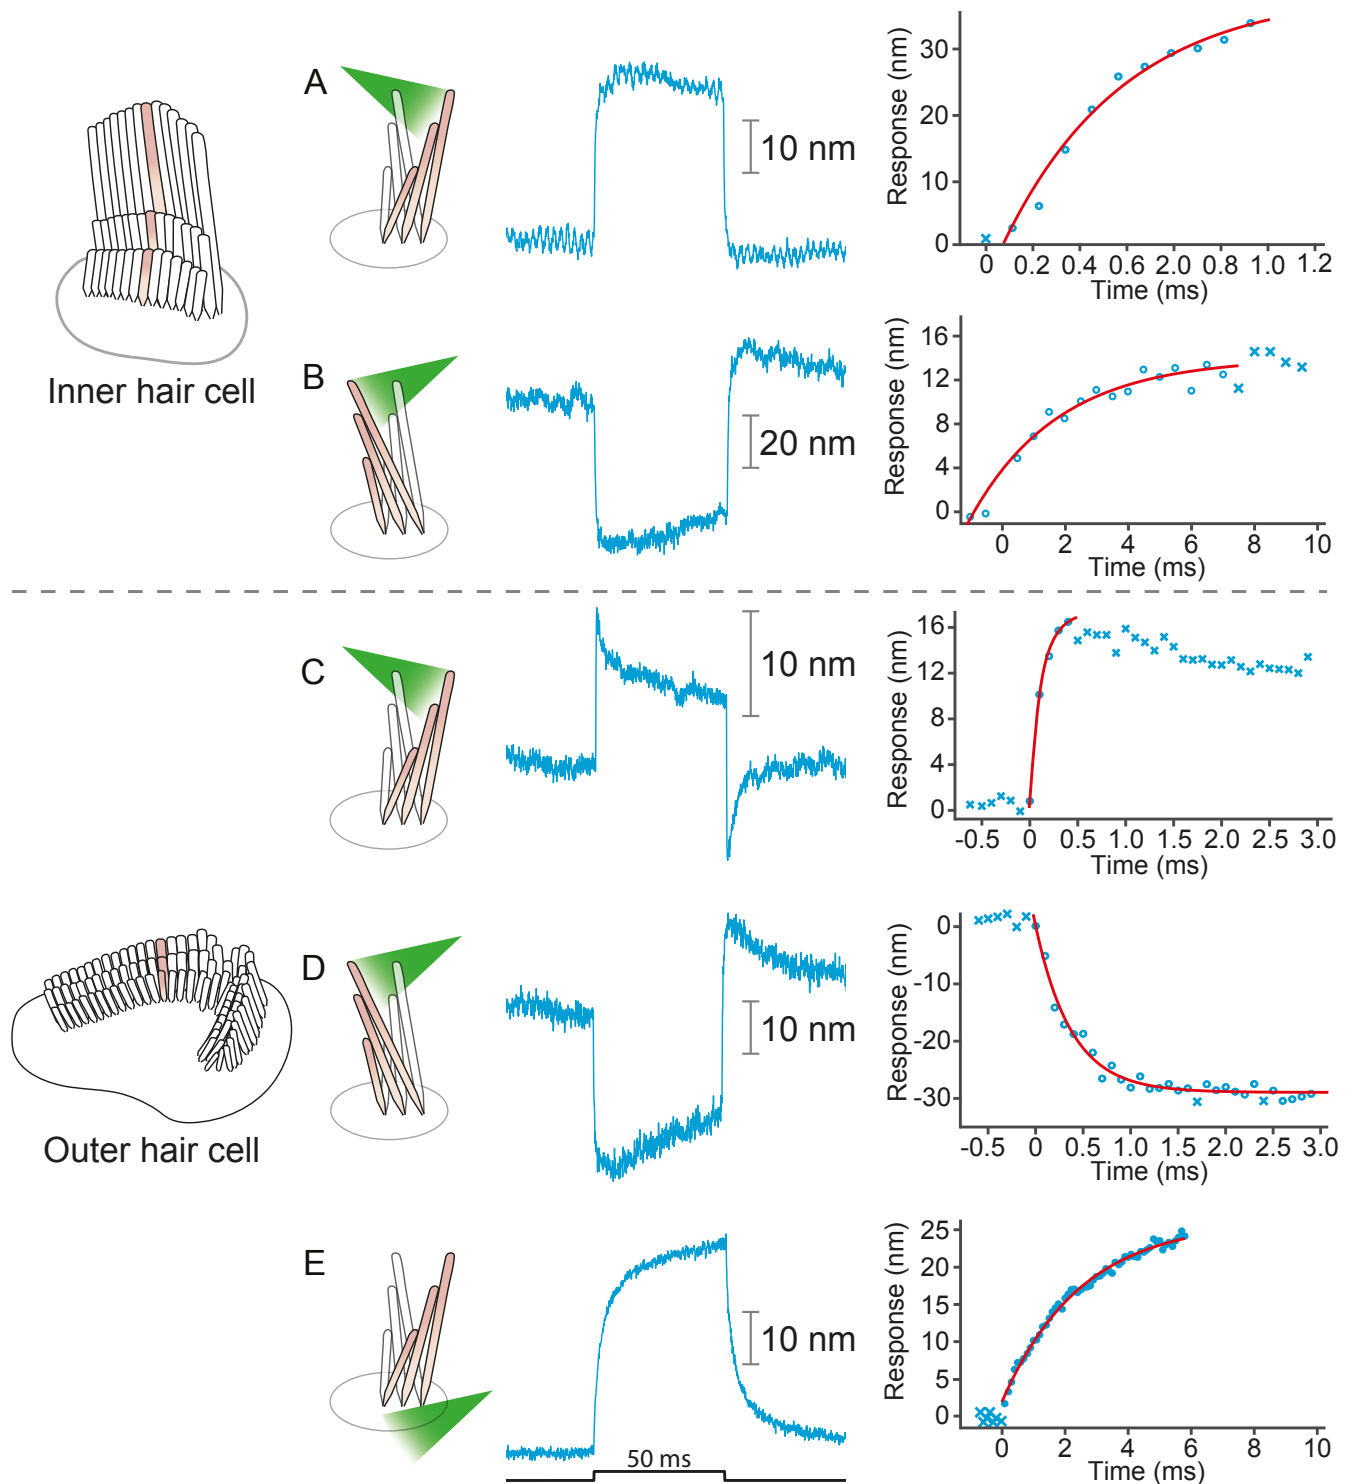

**Figure 3.** Responses of hair bundles from the rat's cochlea. (A) Irradiation of the hair bundle from an inner hair cell evoked motion in the direction of light propagation, here the positive direction, with a time constant of  $459\ \mu\text{s}$ . In this and the other panels, the bundles were stimulated at  $660\ \text{nm}$  with  $18\ \text{mW}$  of input power and the records represent the average of 25 repetitions. This number of repetitions was sufficient to filter the noise and isolate the characteristic shape of the hair-bundle response. (B) A similar experiment with negatively directed irradiation moved the hair bundle in the opposite direction. The time constant is  $258\ \mu\text{s}$ . (C) Stimulation of an outer hair cell's bundle in the positive direction evoked a response with sharp transients at both the onset and the offset of irradiation. As shown in the associated plot, the response rose with a time constant of  $123\ \mu\text{s}$  and peaked in less than  $1\ \text{ms}$ . (D) Negative stimulation of an outer hair cell's bundle evoked movement in the negative direction with an onset time constant of  $377\ \mu\text{s}$ . (E) When a negatively directed light beam was aimed at the soma of an outer hair cell, the bundle moved with a slow time constant of  $2.1\ \text{ms}$  in the positive direction—opposite the direction of light propagation—owing to the photothermal effect.

122 Polarization dependence of hair-bundle responses

123 Because stereocilia are densely filled with parallel actin filaments that exhibit pronounced bire-  
124 fringence (*Kato et al., 1999*), we inquired how this property affected the movement of the bull-  
125 frog's hair bundles upon photonic-force stimulation. After rupturing the tip links, we imaged a  
126 hair bundle on the dual photodiode and aligned the plane of polarization with the long axis of the  
127 stereocilia. We then rotated a half-wave plate through  $90^\circ$  in  $10^\circ$  increments. The light-induced de-  
128 flection declined monotonically to an angle of  $40^\circ$ – $50^\circ$ , but remained roughly constant thereafter  
129 (see *Appendix 1* Fig. 3). That the response did not decline as the cosine of the angle likely reflected  
130 the fact that stereocilia are not parallel, evenly spaced cylinders but rather a more complex array  
131 with varying tilts and separations. This result nonetheless emphasized the importance of attending  
132 to the beam's polarization, which was held parallel with the hair bundles' long axes in subsequent  
133 experiments.

134 **Stimulation of rat hair bundles**

135 We applied photonic stimuli to the hair bundles of both inner and outer hair cells from the cochleas  
136 of young rats. Consistent with previous evidence that mammalian hair bundles are stiffer than their  
137 amphibian counterparts (*Tobin et al., 2019*), the recorded amplitudes of deflection were typically  
138 smaller (Fig. 3A–D). The time constants for the initial displacements were again a few hundred  
139 microseconds. To characterize the efficacy of photonic stimulation for rat hair bundles, we applied  
140 positive stimuli to 22 outer hair cells from three preparations. We deflected 13 hair bundles with  
141 amplitudes varying from 25 nm to 35 nm. We also deflected seven of nine bundles from inner hair  
142 cells; the response amplitudes varied from 10 nm to 75 nm and the trajectories resembled those  
143 from the frog.

144 **Separating the photothermal movement**

145 As a result of localized heat generation, a hair bundle from the frog can move in the positive di-  
146 rection in response to laser irradiation of the cellular apex from any direction (*Azimzadeh et al.,*  
147 *2018*). We found that this phenomenon also occurs in hair bundles of the rat (Fig. 3E). To separate  
148 this photothermal effect from that of photonic force, we took advantage of the fact that the former  
149 requires intact tip links. When we disrupted the tip links with EDTA, we observed that both posi-  
150 tive and negative stimuli evoked movements in the direction of light propagation (see *Appendix 1*  
151 Fig. 4). We also stimulated hair bundles along a direction perpendicular to their axis of symmetry  
152 and again found that they moved in the direction of photon flux (see *Appendix 1* Fig. 4C). These  
153 results indicate that bundle motion upon photonic stimulation can occur in the absence of a pho-  
154 tothermal effect: bundle movements stem solely from optical radiation force.

155 In a frog's hair cell, the photothermal effect apparently results from light absorption by the mi-  
156 tochondria that accumulate around the cuticular plate at the cell's apical surface (*Azimzadeh et al.,*  
157 *2018*). Because in mammalian outer hair cells mitochondria are instead concentrated at the lateral  
158 plasma membrane (*Fuchs, 2010*), it was possible to isolate the photothermal effect by directing  
159 light well below the apical cell surface. Note that the photothermal movement was relatively slow:  
160 its time constant of 2 ms was about ten times that of the movements due to photonic force. Con-  
161 versely, it was possible to avert the photothermal effect by irradiating a mammalian hair bundle  
162 with intact tip links while avoiding irradiation of the cell body.

163 **Survival of mechanotransduction after laser irradiation**

164 The hair bundles of healthy hair cells from the bullfrog can oscillate back-and-forth even in the  
165 absence of external stimulation (*Martin et al., 2003*). These spontaneous oscillations are a man-  
166 ifestation of the active process that these cells employ to amplify mechanical stimuli by counter-  
167 acting viscous damping. The presence of spontaneous oscillations, which require a fully functional  
168 transduction apparatus, offers a means of assessing the viability of hair cells and the preservation  
169 of mechanotransduction following exposure to laser irradiation.





186 drag on a stimulus fiber or the inertia of a piezoelectric actuator. Second, stimulation could be  
 187 made still more rapid by a process analogous to "supercharging" in a voltage-clamp system (*Arm-*  
 188 *strong and Chow, 1987*): transient irradiation with a very bright light could be used to deflect a  
 189 bundle to a desired position, after which a steady force would be applied by weaker illumination  
 190 during the measurement of a response. Because illumination can be switched off, a third virtue  
 191 is that there is no possibility of an ill-defined steady-state offset in bundle position owing to mis-  
 192 positioning of a fiber or leakage from a fluid jet. The uniform illumination of the stereocilia in a  
 193 bundle offers a fourth advantage, especially for mammalian hair bundles that exhibit relatively  
 194 poor lateral coupling between stereocilia. And finally, photonic stimulation can be used in spaces  
 195 too restricted to admit a flexible fiber or fluid jet. In particular, it should be possible to stimulate  
 196 one or several hair bundles in preparations such as a hemicochlea (*He et al., 2004*) or an isolated  
 197 cochlear segment (*Chan and Hudspeth, 2005a,b*).

198 There are two disadvantages to photonic stimulation. Although a routine procedure after the  
 199 assembly of the necessary facilities, fabrication of a tapered optical fiber requires specialized equip-  
 200 ment and a safe environment for the use of etching solution. A second issue is calibration: unlike  
 201 the force delivered by a flexible fiber, which can be calibrated through the fiber's Brownian motion,  
 202 the force exerted by photonic stimulation is not easily measured. The force can nonetheless be  
 203 estimated by the use of targets whose stiffness has been independently determined, especially  
 204 glass fibers such as those used in this study, or passive hair bundles including those subjected to  
 205 chemical fixation.

## 206 **Materials and methods**

### 207 **Estimation of photonic force**

208 Each absorbed photon imparts all of its original momentum to the absorbing object and thereby  
 209 provides an impulsive force. A reflected photon delivers twice the momentum provided by an ab-  
 210 sorbed one, whereas a refracted photon imparts momentum dependent on the angle of refraction.  
 211 Because reflection sets the upper limit of the force that might be delivered to a hair bundle by a  
 212 particular beam of light, we begin our analysis by treating the bundle as a perfect reflector. Aver-  
 213 aged over one oscillation of the electromagnetic field, the radiation pressure due to illumination  
 214 striking a hair bundle at an incident angle  $\theta$  to the normal of the surface is (*Paschotta, 2010; Hulst,*  
 215 *2003*)

$$P = 2 \frac{\langle S \rangle}{c} \cos^2 \theta \quad (1)$$

216 in which  $P$  is the radiation pressure,  $S$  is the average power of the electromagnetic wave, and  $c$   
 217 is the speed of light in vacuum. Equation 1 can alternatively be written in terms of irradiance  $I$ , or  
 218 power per unit area, with units  $\text{W} \cdot \text{m}^{-2}$ , and laser power ( $P_{wr}$ ):

$$P = 2 \frac{I}{c} \cos^2 \theta = 2 \frac{P_{wr}}{A \cdot c} \cos^2 \theta \quad (2)$$

219 The force  $F$  produced at an angle  $\theta$  is then

$$F = 2 \frac{P_{wr}}{c} \cos \theta \quad (3)$$

220 For completely absorbed photons, this relation can be modified to

$$F = \frac{P_{wr}}{c} \cos \theta \quad (4)$$

221 In a physiological solution, the refractive index is approximately 1.33, and therefore the speed  
 222 of light is  $c/1.33$ . The angle of incidence in our experiments is  $20^\circ$ , which is set by physical clearance  
 223 between the objective lens and the preparation. By Snell's law, the angle of reflection is equal to  
 224 the angle of incidence. Therefore, in the purely reflective case, using Eq. 3, we estimate that 10 mW  
 225 of laser power that impinges normal to the surface of the reflector generates approximately 80 pN



226 of force. However, this upper limit of the force is not achievable because stereocilia are not perfect  
 227 mirrors. The actual force experienced by a hair bundle depends on the difference of the refractive  
 228 indices between the solution and the stereocilia, a larger difference indicating more reflected light  
 229 and larger force. As discussed below, the angle of incidence is also important.

230 Interaction of light with stereocilia: simple reflection and refraction

231 The interaction of light with stereocilia can be described by Fresnel equations that specify how  
 232 the electric field vector's orientation, either parallel or perpendicular to the plane of incidence,  
 233 determines the amplitude of reflection and transmission (Fig. 5) (Born et al., 1999).

$$R_{\parallel} = \frac{n_2 \cos \theta_1 - n_1 \cos \theta_T}{n_2 \cos \theta_1 + n_1 \cos \theta_T} A_{\parallel} \quad (5)$$

$$R_{\perp} = \frac{n_1 \cos \theta_1 - n_2 \cos \theta_T}{n_1 \cos \theta_1 + n_2 \cos \theta_T} A_{\perp}$$

$$T_{\parallel} = \frac{2n_1 \cos \theta_1}{n_2 \cos \theta_1 + n_1 \cos \theta_T} A_{\parallel} \quad (6)$$

$$T_{\perp} = \frac{2n_1 \cos \theta_1}{n_1 \cos \theta_1 + n_2 \cos \theta_T} A_{\perp}$$

235 In this set of equations, the transmis-  
 236 sion coefficient  $T$  or reflection coefficient  
 237  $R$  specify the fraction of light either re-  
 238 flected or transmitted at the interface of  
 239 two media. The subscripts  $\parallel$  and  $\perp$  de-  
 240 note the orientation of the electric field,  
 241 respectively parallel or perpendicular to  
 242 the plane of incidence. Light of initial  
 243 amplitude  $A$  propagates from the medium  
 244 of refractive index  $n_1$  into that of refrac-  
 245 tive index  $n_2$ . The angles  $\theta_1$  and  $\theta_T$  are  
 246 the angles of incidence and transmission  
 247 (refraction), respectively. To estimate the  
 248 refractive index of stereocilia we use the  
 249 Gladstone-Dale relation (Gladstone and  
 250 Dale, 1863)

$$n = n_0 + \alpha \rho \quad (7)$$

251 in which  $n_0$  is the refractive index of the solution,  $\alpha$  is the refractive index increment for pro-  
 252 tein (Fasman, 2020),  $200 \text{ m}^3 \cdot \text{kg}^{-1}$ , and  $\rho$  is the concentration of protein in a stereocilium,  $250 \text{ kg} \cdot \text{m}^{-3}$   
 253 (unpublished data). We expect the refractive index of the stereocilium to be approximately 1.4. The  
 254 incident angle in our apparatus is  $20^\circ$ , so by use of Snell's law we find the angle of refraction for  
 255 the transmitted light beam to be  $19^\circ$ . Applying these values to Fresnel's equations, we calculate the  
 256 following coefficients:

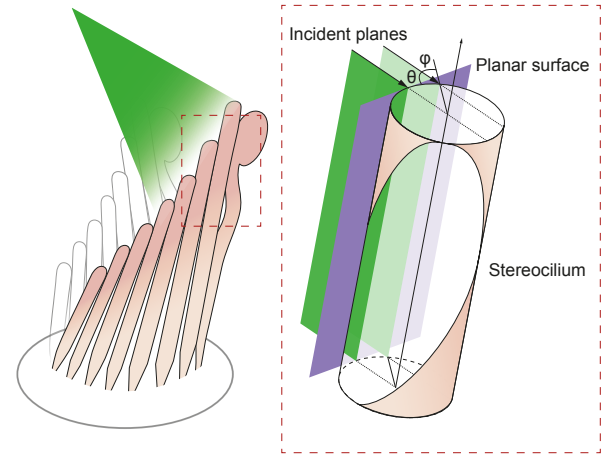

**Figure 5.** Geometry of irradiation of a cylindrical surface. As the beam from an optical fiber strikes a hair bundle, two representative sheets of the incoming light (green) are depicted along with the propagation direction of each (black arrows) and their angle of incidence  $\theta$  with respect to the long axis of the stereocilium. Both incident planes are perpendicular to a plane tangent to the stereociliary surface (purple). Along its line of incidence onto the stereocilium, the centered sheet of light (dark green) is radially normal to the cylinder. The off-center sheet of light (pale green) strikes the stereocilium at an angle  $\varphi$  with respect to the normal.

$$R_{\parallel} = 0.022$$

$$R_{\perp} = 0.029$$

$$T_{\parallel} = 0.971$$

$$T_{\perp} = 0.971 \quad (8)$$

257 In view of the strong birefringence of stereocilia, we expect the photonic force to be great-  
 258 est when the electric field is aligned parallel to a hair bundle's vertical axis. Taking into account  
 259 only the parallel components of the Fresnel equations, the coefficient of the reflected amplitude

260 is  $R_{\parallel} = 0.022$ : approximately 0.05% of the power, or only 0.015 mW of the 30 mW incident on the  
 261 stereocilia, should be reflected. The photonic force generated from reflection is therefore about  
 262 0.45 pN, a force unable to move a hair bundle appreciably. We must therefore reject a simple model  
 263 of reflection and seek an understanding based on the reflective properties of curved surfaces.

#### 264 Interaction of light with stereocilia: reflection from a cylindrical surface

265 The reflectivity, or fraction of backscattered light, is significantly higher for a curved object than for  
 266 a planar one (*Ashkin, 1970*). We may analyze this effect by considering the behavior of flat sheets of  
 267 light incident upon a cylinder such as a stereocilium and parallel with its long axis (Fig. 6A). Although  
 268 a light sheet that strikes the stereocilium perpendicular to its surface exhibits only the effects dis-  
 269 cussed in the previous section, an off-center light sheet can produce a significantly greater force.

270 At any position along the stereocilium we may evaluate the behavior of representative rays of  
 271 light as they impinge upon the front and back surfaces of the stereocilium. A ray exactly normal  
 272 to the surface is partially reflected and partially transmitted, without refraction, through the stere-  
 273 ocilium (Fig. 6B). This ray exerts force on the stereocilium by reflecting from its front surface, with  
 274 a lesser force provided by a fraction of the transmitted light that scatters from the back surface.

275 A ray that strikes the stereocilium at a modest distance from its center undergoes partial re-  
 276 flection at the front surface, thereby producing a force in the direction of propagation and toward  
 277 the stereociliary axis (Fig. 6C). Because the transmitted portion of the ray is incident upon the back  
 278 surface of the stereocilium at an angle less than the critical angle for total internal reflection, it un-  
 279 dergoes both reflection and refraction as it exits the stereocilium. That process again pushes the  
 280 stereocilium in the direction of propagation as well as away from the midplane of the stereocilium.

281 A surprising effect ensues for a ray that impinges upon the stereocilium well away from its  
 282 midplane. Such a ray undergoes partial reflection, pushing the stereocilium in the direction of  
 283 propagation and toward its axis (Fig. 6D). The refracted light then strikes the back surface of the  
 284 stereocilium at an angle that exceeds the critical angle for total internal reflection, which—for stere-  
 285 ociliary cytoplasm of refractive index  $n_s \approx 1.4$  and water of  $n_w = 1.33$ —is approximately  $72^\circ$ . That  
 286 ray exerts a force in the direction of light propagation and toward the stereociliary midplane. More-  
 287 over, before it eventually exits the stereocilium, the reflected ray might well undergo one or more  
 288 additional total internal reflections, the first several of which exert additional force in the direction  
 289 of propagation.

290 Because a stereocilium's diameter is similar to the wavelength of light, its optical properties can-  
 291 not be described in detail by geometric optics, but involve calculations beyond the scope of this  
 292 work. However, it has been shown that for a cylinder with an aspect ratio of 15, similar to that of a  
 293 stereocilium of length  $8 \mu\text{m}$  and diameter  $0.5 \mu\text{m}$ , the reflectivity is about 3.5 times that of a sphere  
 294 of equal volume (*Gordon, 2011*). Moreover, because stereocilia are closely spaced in a regular ge-  
 295 ometric array, they likely form a grating that exhibits complex interference patterns. Nonetheless,  
 296 even the qualitative description offered above emphasizes the importance of stereociliary curva-  
 297 ture in providing exceptionally high reflection and unexpectedly great forces on stereocilia.

#### 298 **Fabrication of a tapered optical fiber**

299 In order to produce an optical fiber with a tip small enough to approach an individual hair bundle, it  
 300 is necessary to thin the fiber's  $60 \mu\text{m}$ -thick cladding to expose the inner core of  $5 \mu\text{m}$  diameter. Vari-  
 301 ous methods have been employed to reduce the diameter of fibers in near-field optical microscopy  
 302 and in the development of optical-fiber sensors. One common method is to use a carbon dioxide  
 303 laser to machine optical fibers (*Ozcan et al., 2007*). Although this method is capable of creating sym-  
 304 metrical fibers,  $\text{CO}_2$  lasers are expensive and require complex optics. Two other methods used for  
 305 removing material in optical fibers are femtosecond laser micromachining (*Wei et al., 2008a,b; Liao*  
 306 *et al., 2012; Yuan et al., 2012*) and focused-ion-beam milling (*Kou et al., 2010; Yuan et al., 2011;*  
 307 *André et al., 2014*). Although both methods are effective, they are time-consuming and require  
 308 expensive instruments.

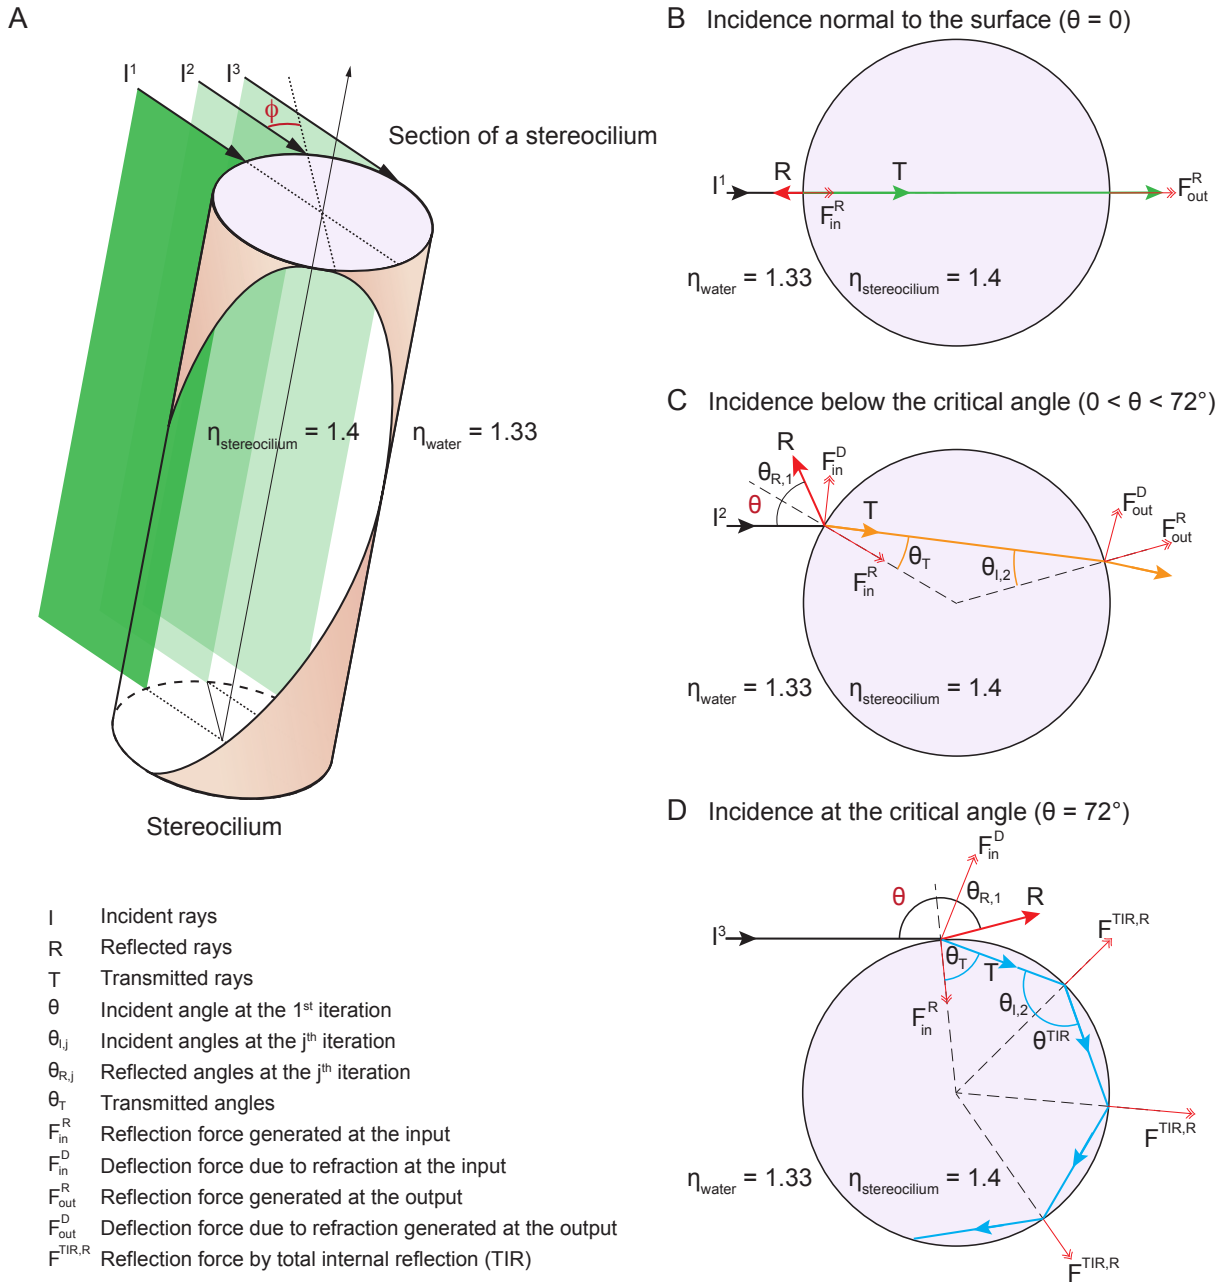

**Figure 6.** Potential fates of a plane wave incident on a stereocilium. (A) Three representative rays of a light beam interact with a stereocilium; I, R and T denote the incident, reflected, and transmitted portions of each ray. All superscripts and subscripts are defined in the figure. The rays  $I^1$ ,  $I^2$ ,  $I^3$  (black arrows) indicate the direction of light in water (refractive index 1.33) as it strikes a stereocilium whose refractive index is 1.4 and whose section is shown in lavender. The ray  $I^1$  is incident along the normal to the stereocilium, the axis of symmetry of the section. For parallel rays further from  $I^1$ , the angle of incidence  $\phi$  at which the light strikes the stereocilium's surface increases as measured with respect to the normal. These three rays of incident light impart distinct forces on the stereocilium. (B) When a ray is reflected, it forces the stereocilium in the opposite direction and the direction of this input reflection force  $F_{in}^R$  is radially aligned with the center. (C) If the ray is deflected due to refraction, a deflection force ( $F_{in}^D$ ) is generated on the stereocilium that is perpendicular to the direction of the ray as it propagates within the stereocilium. The incident angle is equal to the reflection angle, as is the case for the ray  $I^2$  as it first strikes the stereocilium ( $\theta = \theta_{R,1}$ ). The light that is refracted propagates along T (orange line) once inside the stereocilium until it reaches the boundary with water. At this second collision the incident angle  $\theta_{i,2}$  is equal to the refractive angle  $\theta_T$ , which is too small to cause another reflection; as a result, the ray exits into water and no deflection force is generated. (D) A third kind of force arises if total internal reflection (TIR) occurs, as happens when the angle of the incident light beam is such that a ray remains trapped inside the stereocilium as it is repeatedly reflected at the boundary with water. In the case of ray  $I^3$ , the incident angle is equal to the critical angle for total internal reflection— $72^\circ$  in this case—and the light remains within the stereocilium as T (blue arrow) and is reflected repeatedly each time it reaches the boundary with water. Three successive total internal reflections are shown; each generates a reflection force  $F^{TIR,R}$ .

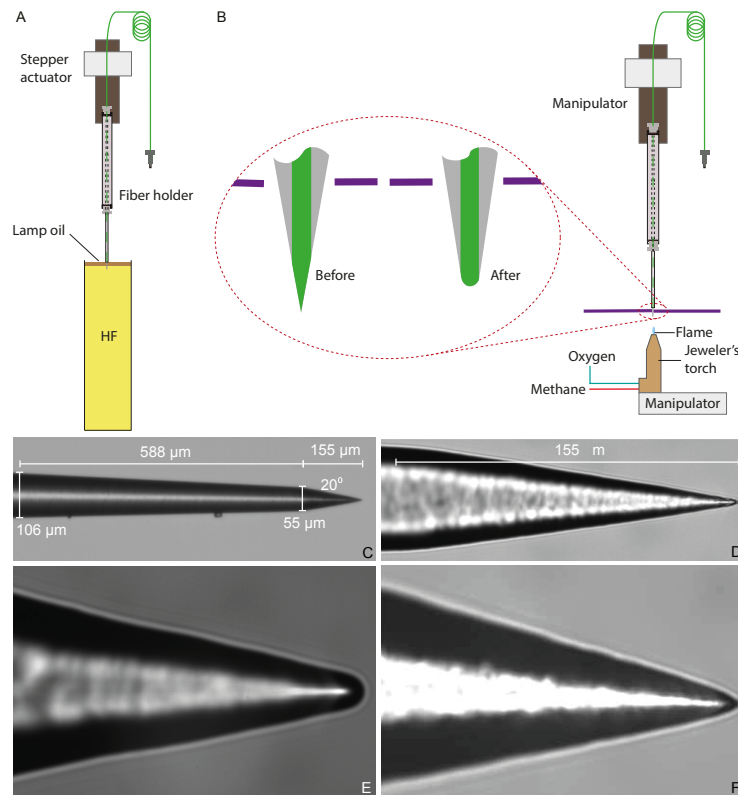

**Figure 7.** Preparation of a tapered optical fiber. (A) A schematic diagram depicts the process of reducing the optical fiber's diameter by chemical etching. The tapered optical fiber is attached to the shaft of a linear actuator and lowered into a tube of hydrofluoric acid (HF) topped with a thin layer of lamp oil (kerosene). The convergence angle of the fiber's tip is determined by the rate at which the tip is extracted from the acid. (B) A schematic diagram depicts the apparatus for creating a hemispherical lens at the fiber's tip. With the aid of a three-axis micromanipulator, the fiber's tip is inserted through a hole less than 1 mm in diameter in a horizontally mounted metal plate (purple line). The nozzle of a jeweler's torch is aligned with the optical fiber by means of a second micromanipulator. Careful adjustment of the flow of oxygen and methane yields a flame about 0.5 mm in height. Under microscopic observation, the flame is raised until the fiber's tip melts, whereupon the fiber is immediately retracted. (C) An image of a fiber's tip after chemical etching with 48 % hydrofluoric acid and before polishing shows a slow taper over 588  $\mu\text{m}$  followed by a steep taper over the final 155  $\mu\text{m}$ . (D) At a higher magnification, the tapered but unpolished tip displays a cone angle of about 20°. (E) A high-magnification image depicts a polished tip with a relatively large hemispherical lens. (F) Another polished tip ends in a narrower lens.

309 On the basis of previous experiments with glass fibers, we suspected that the interaction of  
 310 tapered fibers with living specimens would contaminate the fibers' tips and thus limit the use of  
 311 each fiber to only a few experiments. Furthermore, the gradual degradation due to several hun-  
 312 dred high-power optical pulses during an experiment would limit a fiber's use to a few experiments.  
 313 Both considerations required that fibers be tapered easily and cost-effectively in a typical labora-  
 314 tory setting. We created tapered optical fibers by Turner's wet chemical etching with hydrofluoric  
 315 acid (André *et al.*, 2014). With this method, a fiber can be shaped in about 1.5 hr in any laboratory  
 316 with a fume hood and few tools. In shaping each fiber, we started with a single-mode optical fiber  
 317 1 m in length and with an FC/PC connector at one end. The distal end of the fiber was prepared by  
 318 stripping a 12 mm length of its polymeric jacket and the polyamide coating and cleaning it with 70%  
 319 ethanol. We inserted the fiber's end into a holder that allowed it to be attached to manipulators  
 320 during the fabrication process.

321 Etching was conducted in a fume hood (Fig. 7A). After 47.5 mL of concentrated (48%) hydrofluoric  
 322 acid had been placed in a polypropylene tube (Corning Life Sciences, Tewksbury, MA, USA), 2.5 mL

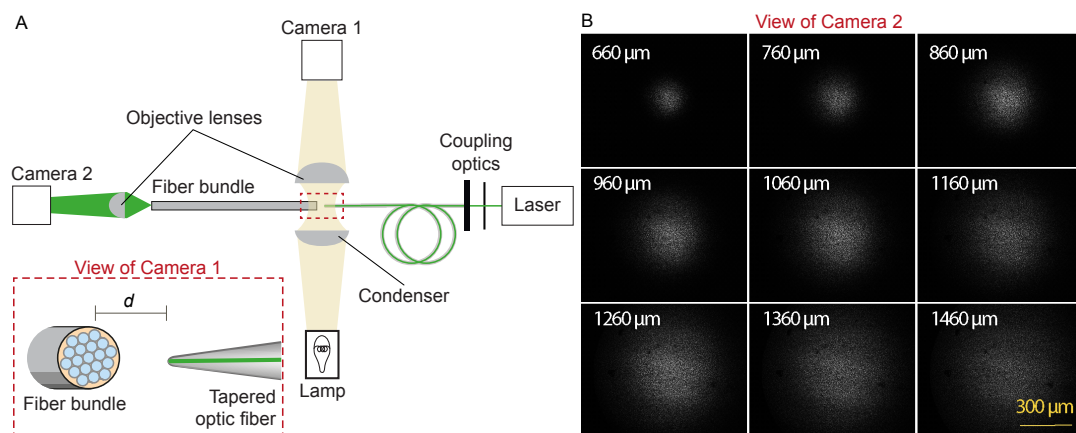

**Figure 8.** Characterization of the light spot produced by a polished fiber. (A) A schematic diagram depicts the apparatus for characterization of a fiber's output. During observation by camera 1 attached to the microscope, the tapered optical fiber is coupled to the laser and brought near the transverse surface of a fiber bundle (IGN-8/30, Sumitomo Electric, Japan). The view through camera 1, with the fiber tip pointing at one end of the fiber bundle a distance  $d$  away, is schematized in the inset. The fiber bundle has 30,000 inner cores, each  $2\ \mu\text{m}$  in diameter and with a center-to-center spacing of  $4\ \mu\text{m}$ . The distal end of the bundle is imaged by camera 2 at a magnification of 11.6X. (B) Images of the output, as captured with camera 2, show the divergence of the light beam as the tapered optical fiber is brought approximately  $660\ \mu\text{m}$  from the bundle and retracted by intervals of  $100\ \mu\text{m}$ .

323 of red kerosene oil was added. The oil layer's purpose was twofold. First, it provided protection to  
 324 the fiber above the surface from attack by acid vapor. Second, the height of the aqueous meniscus  
 325 was dependent upon the diameter of the immersed fiber, and thus declined as etching proceeded.  
 326 When etching was complete, the oil layer isolated the tip from the acid.

327 The fiber's holder was attached to a motorized linear actuator (Nanotec Electronic GmbH & Co  
 328 KG, Feldkirchen, Germany) with  $3\ \mu\text{m}$  positioning resolution and the height of its tip was controlled  
 329 through a computer interface (LabVIEW; National Instruments, Austin, TX). Because the diameter  
 330 of the fiber's tip at any point along its length depended on the duration of its immersion, it was  
 331 critical to control the fiber's extraction speed. For maximal stability during experiments, we set the  
 332 length of the taper to 8 mm, the minimum required for reliable clearance of the objective lens.

333 After coupling a  $633\ \text{nm}$  wavelength laser to the optical fiber to render its tip visible during etch-  
 334 ing, we lowered the fiber until its tip was immediately above the interface between the oil and the  
 335 acid. Under computer control, the actuator then performed a series of insertions and extractions  
 336 of the fiber. The initial program inserted the fiber  $10\ \text{mm}$  into the acid at  $2\ \text{mm} \cdot \text{s}^{-1}$  and extracted  
 337  $8\ \text{mm}$  at the same speed. The routine next extracted the optical fiber for 20 min at  $37.5\ \mu\text{m} \cdot \text{min}^{-1}$ ,  
 338 reducing its diameter from  $125\ \mu\text{m}$  to  $60\ \mu\text{m}$ . The extraction then stopped and the fiber remained in  
 339 the acid for 18min, during which tip was etched at a steeper angle by the gradual fall of the meniscus.  
 340 The fiber was rinsed with distilled water and then with isopropyl alcohol and air-dried in the  
 341 fume hood.

#### 342 Creation of a miniature hemispherical lens

343 When light exits an optical fiber into a medium of lower refractive index, such as water, it diverges  
 344 rapidly (Kohls *et al.*, 1998). To minimize this divergence and direct the light to fall evenly upon a  
 345 hair bundle, we created a focusing lens at the fiber's tip. Although it is a common practice to attach  
 346 microscopic lenses to optical fibers with flat, polished ends (Liberale *et al.*, 2010; Eversberg and  
 347 Vollmann, 2015), it was not practical do so with a taped optical fiber ending in a sharp point. We  
 348 therefore created a lens by melting the fiber's tip of silicon dioxide, which melts (Haynes, 2011) at  
 349  $1713\ ^\circ\text{C}$ .

350 We used a jeweler's torch with a nozzle  $250\ \mu\text{m}$  in diameter and fed with pressurized methane

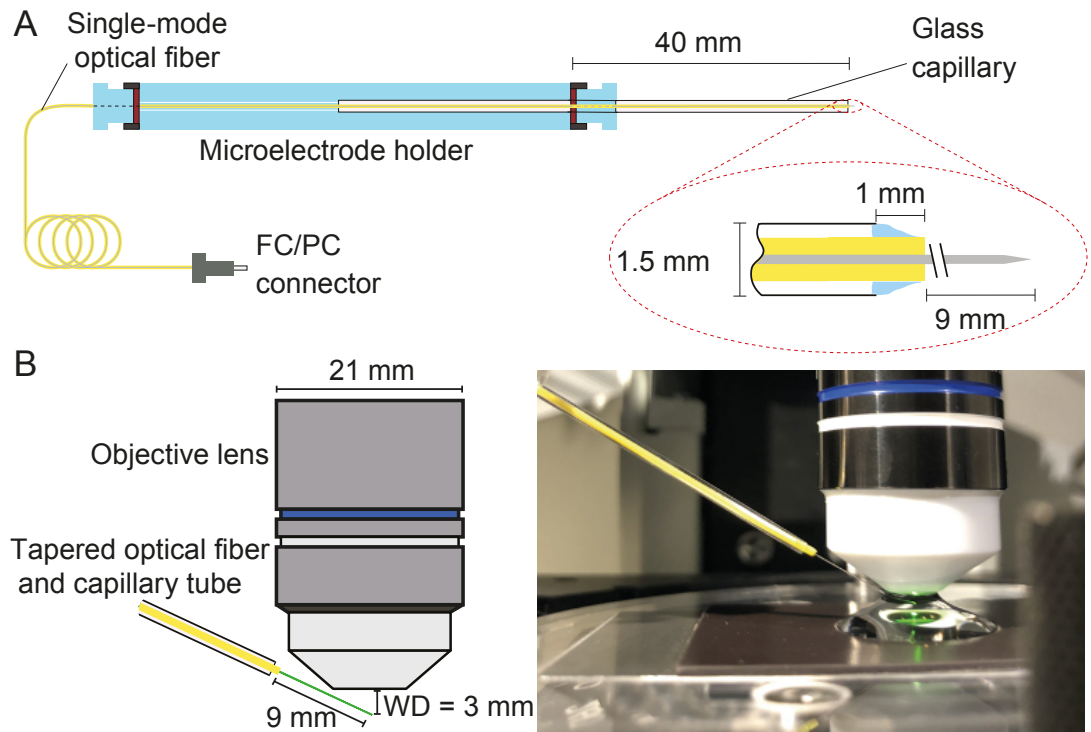

**Figure 9.** Positioning fiber under an objective lens using a custom-made holder. (A) Holder for the tapered optical fiber. The schematic drawing portrays a tapered optical fiber inserted in the mount constructed from a microelectrode holder and a glass capillary, from which the fiber's distal tip protrudes 10 mm. The coiled optical fiber's inner core is depicted in gray inside the yellow jacket. As seen in the inset, the space between the glass capillary and the yellow jacket that protrudes 1 mm past the capillary's tip is packed with vacuum grease (light blue). The distal end of the fiber is terminated with an FC/PC connector. Positioning of a fiber under an objective lens. (B) A schematic drawing (left) shows the length of the glass capillary that protrudes from the fiber-holder relative to the objective lens. The photograph (right) shows the tapered optical fiber, objective lens of the microscope, and preparation chamber in an experiment.

351 and oxygen. Creating a lens required clear visualization of the fiber's sharp tip and precise manip-  
 352 ulation of the torch (Fig. 7B). Using a pair of manual manipulators, we mounted the torch below  
 353 the fiber's tip and visualized them with a horizontal microscope. Because the hot air rising from  
 354 the torch caused the thin tip of the fiber to flutter, we reduced the convection around the fiber by  
 355 partially exposing the tip to the torch's flame through an aperture 1 mm in diameter in a square  
 356 metal plate 50 mm on each side. After focusing the image of the fiber's tip on an eyepiece reticle,  
 357 we carefully raised the unlit torch toward the fiber and aligned the two to prevent asymmetry in  
 358 the lens. The torch was then lowered, lit, and adjusted to a flame height of about 0.5 mm. As we  
 359 then raised the torch, the core of the fiber began to melt and promptly assumed a hemispherical  
 360 shape (Fig. 7C–F). We immediately lowered the torch and allowed the fiber to cool before removing  
 361 it from the apparatus.

#### 362 Estimation of the area of irradiation

363 After fabricating a tapered optical fiber of suitable shape, we characterized its pattern of illumina-  
 364 tion before using it in experiments. This process was designed to evaluate the optimal distance  
 365 between the fibers' tip and a hair bundle so that we could match the diameter of the light spot to  
 366 the bundle's width.

367 After coupling a laser to the tapered fiber, we approximated the fiber's tip to the flat end of an  
 368 ordered fiber bundle and monitored their separation under a microscope with a camera (Fig. 8A).  
 369 Passing through a droplet of water, the light from the tapered fiber impinged on the fiber cores



370 of the bundle and propagated to the distal end, where it was imaged through a dry objective lens  
 371 (Plan 10X, numerical aperture 0.25, Olympus, Tokyo, Japan) onto second camera. The illuminated  
 372 fiber cores defined the diameter of the illuminated area on the fiber bundle (Fig. 8B). By capturing  
 373 images at intervals of 100  $\mu\text{m}$  as the tip of the tapered fiber was withdrawn from the fiber bundle,  
 374 and measuring the diameter of the illuminated area at 95 % of the power spread, we estimated  
 375 the divergence angle of the light cone.

### 376 **Experimental configuration**

377 During each experiment, the tapered optical fiber was inserted through a glass capillary placed in  
 378 a custom-made electrode holder that could be affixed to a micromanipulator (Fig. 9A). This holder  
 379 ensured that the fiber's tip was stable despite possible vibrations or displacements of the remain-  
 380 der of the fiber.

381 Under the control of a micromanipulator (ROE 200, Sutter Instruments, Novato, CA, USA), the  
 382 fiber's distal end was introduced into the experimental chamber beneath a 60X water-immersion  
 383 objective lens (LUMPlanFL N, numerical aperture 1.0, Olympus, Tokyo, Japan). The incidence angle  
 384 of about 20° with respect to the horizontal ensured that the fiber cleared both the upper edge of  
 385 the experimental chamber and the lower rim of the lens (Fig. 9B).

386 Light from a 600 nm light-emitting diode (Prizmatix Ltd., Southfield, MI, USA) illuminated the spec-  
 387 imen through an inverted 60X water-immersion objective lens (LUMPlan FI/IR, numerical aperture  
 388 0.9, Olympus) that served as a condenser (see **Appendix 1** Fig. 1). To permit differential-interference  
 389 imaging, a polarizer was positioned just above the microscope's field diaphragm and a crossed  
 390 analyzer above its tube lens, and both objective lenses were equipped with Wollaston prisms. A  
 391 rotating quarter-wave plate above the polarizer permitted optimization of the image, and a heat  
 392 filter protected the specimen from infrared damage. Light that had traversed the specimen, the ob-  
 393 jective lens, and the tube lens was relayed by two mirrors and projected with a total magnification  
 394 of 900X onto a dual photodiode, which permitted measurements of hair-bundle movement with  
 395 nanometer precision. A dichroic mirror imposed before the photodiode prevented contamination  
 396 of the movement signal by light from the stimulating laser. For the selection of appropriate hair  
 397 bundles, the light path could be diverted to a camera that permitted observation of the specimen  
 398 on a digital monitor.

### 399 **Acknowledgments**

400 We thank Brian Fabella for assistance with the fabrication of apparatus and the programming of  
 401 data-acquisition software and Rodrigo Alonso for the preparation of bullfrog sacculi. The members  
 402 of our research groups graciously provided critical comments on the manuscript. A.J.H. is an Inves-  
 403 tigator of Howard Hughes Medical Institute. A.S.K. was supported by grants 108034/Z/15/Z and  
 404 214234/Z/18/Z from the Wellcome Trust and by an Imperial College Network of Excellence Award.

### 405 **References**

- 406 **André RM**, Pevéc S, Becker M, Dellith J, Rothhardt M, Marques MB, Donlagic D, Bartelt H, Frazão O. Fo-  
 407 cused ion beam post-processing of optical fiber Fabry-Perot cavities for sensing applications. *Optics Ex-*  
 408 *press*. 2014 Jun; 22(11):13102–13108. <https://www.osapublishing.org/oe/abstract.cfm?uri=oe-22-11-13102>,  
 409 [doi: 10.1364/OE.22.013102](https://doi.org/10.1364/OE.22.013102).
- 410 **Armstrong CM**, Chow RH. Supercharging: a method for improving patch-clamp performance. *Biophysical*  
 411 *Journal*. 1987 Jul; 52(1):133–136.
- 412 **Ashkin A**. Acceleration and Trapping of Particles by Radiation Pressure. *Physical Review Letters*. 1970 Jan;  
 413 24(4):156–159. <https://link.aps.org/doi/10.1103/PhysRevLett.24.156>, [doi: 10.1103/PhysRevLett.24.156](https://doi.org/10.1103/PhysRevLett.24.156).
- 414 **Azimzadeh JB**, Fabella BA, Kastan NR, Hudspeth AJ. Thermal Excitation of the Mechanotransduction Apparatus  
 415 of Hair Cells. *Neuron*. 2018; 97(3):586–595.e4. [doi: 10.1016/j.neuron.2018.01.013](https://doi.org/10.1016/j.neuron.2018.01.013).



- 416 **Benser ME**, Marquis RE, Hudspeth AJ. Rapid, active hair bundle movements in hair cells from the bullfrog's  
417 sacculus. *The Journal of neuroscience: the official journal of the Society for Neuroscience*. 1996 Sep;  
418 16(18):5629–5643.
- 419 **Born M**, Wolf E, Bhatia AB, Clemmow PC, Gabor D, Stokes AR, Taylor AM, Wayman PA, Wilcock WL. *Princi-*  
420 *ples of Optics: Electromagnetic Theory of Propagation, Interference and Diffraction of Light*. 7th edition ed.  
421 Cambridge ; New York: Cambridge University Press; 1999.
- 422 **Chan DK**, Hudspeth AJ. Ca<sup>2+</sup> current-driven nonlinear amplification by the mammalian cochlea in vitro. *Nature*  
423 *neuroscience*. 2005 Feb; 8(2):149–155. doi: 10.1038/nn1385.
- 424 **Chan DK**, Hudspeth AJ. Mechanical responses of the organ of corti to acoustic and electrical stimulation in  
425 vitro. *Biophysical journal*. 2005 Dec; 89(6):4382–4395. doi: 10.1529/biophysj.105.070474.
- 426 **Cheung ELM**, Corey DP. Ca<sup>2+</sup> changes the force sensitivity of the hair-cell transduction channel. *Biophysical*  
427 *journal*. 2006 Jan; 90(1):124–139. doi: 10.1529/biophysj.105.061226.
- 428 **Corns LF**, Johnson SL, Kros CJ, Marcotti W. Calcium entry into stereocilia drives adaptation of the mechanoelec-  
429 trical transducer current of mammalian cochlear hair cells. *Proceedings of the National Academy of Sciences*  
430 *of the United States of America*. 2014 Sep; doi: 10.1073/pnas.1409920111.
- 431 **Crawford AC**, Fettiplace R. The mechanical properties of ciliary bundles of turtle cochlear hair cells. *The Journal*  
432 *of physiology*. 1985 Jul; 364:359–379.
- 433 **Dinklo T**, Meulenber CJW, van Netten SM. Frequency-dependent properties of a fluid jet stimulus: calibration,  
434 modeling, and application to cochlear hair cell bundles. *Journal of the Association for Research in Otolaryn-*  
435 *gology: JARO*. 2007 Jun; 8(2):167–182. doi: 10.1007/s10162-007-0080-0.
- 436 **Eversberg T**, Vollmann K. *Spectroscopic Instrumentation: Fundamentals and Guidelines for Astronomers*. As-  
437 *tronomy and Planetary Sciences, Berlin Heidelberg: Springer-Verlag; 2015. [https://www.springer.com/gp/](https://www.springer.com/gp/book/9783662445341)*  
438 *book/9783662445341*, doi: 10.1007/978-3-662-44535-8.
- 439 **Fasman GD**. *Handbook of Biochemistry: Section A Proteins, Volume II*. Routledge & CRC Press;  
440 2020. [https://www.routledge.com/Handbook-of-Biochemistry-Section-A-Proteins-Volume-II/Fasman/p/book/](https://www.routledge.com/Handbook-of-Biochemistry-Section-A-Proteins-Volume-II/Fasman/p/book/9781315893303)  
441 [9781315893303](https://www.routledge.com/Handbook-of-Biochemistry-Section-A-Proteins-Volume-II/Fasman/p/book/9781315893303).
- 442 Fuchs PA, editor. *Oxford Handbook of Auditory Science: The Ear*. Oxford University Press; 2010. [https:](https://www.oxfordhandbooks.com/view/10.1093/oxfordhb/9780199233397.001.0001/oxfordhb-9780199233397)  
443 [://www.oxfordhandbooks.com/view/10.1093/oxfordhb/9780199233397.001.0001/oxfordhb-9780199233397](https://www.oxfordhandbooks.com/view/10.1093/oxfordhb/9780199233397.001.0001/oxfordhb-9780199233397), doi:  
444 [10.1093/oxfordhb/9780199233397.001.0001](https://www.oxfordhandbooks.com/view/10.1093/oxfordhb/9780199233397.001.0001/oxfordhb-9780199233397).
- 445 **Gladstone JH**, Dale TP. XIV. Researches on the refraction, dispersion, and sensitiveness of liquids. *Philosophical*  
446 *Transactions of the Royal Society of London*. 1863 Jan; 153:317–343. [https://royalsocietypublishing.org/doi/](https://royalsocietypublishing.org/doi/abs/10.1098/rstl.1863.0014)  
447 [abs/10.1098/rstl.1863.0014](https://royalsocietypublishing.org/doi/abs/10.1098/rstl.1863.0014), doi: 10.1098/rstl.1863.0014.
- 448 **Gordon HR**. Light scattering and absorption by randomly-oriented cylinders: dependence on aspect ratio  
449 for refractive indices applicable for marine particles. *Optics Express*. 2011 Feb; 19(5):4673–4691. [https:](https://www.osapublishing.org/oe/abstract.cfm?uri=oe-19-5-4673)  
450 [://www.osapublishing.org/oe/abstract.cfm?uri=oe-19-5-4673](https://www.osapublishing.org/oe/abstract.cfm?uri=oe-19-5-4673), doi: 10.1364/OE.19.004673.
- 451 **Géléoc GS**, Lennan GW, Richardson GP, Kros CJ. A quantitative comparison of mechano-electrical transduction in  
452 vestibular and auditory hair cells of neonatal mice. *Proceedings Biological Sciences*. 1997 Apr; 264(1381):611–  
453 621. doi: 10.1098/rspb.1997.0087.
- 454 Haynes WM, editor. *CRC Handbook of Chemistry and Physics, 92nd Edition*. 92nd edition ed. Boca Raton, Fla.:  
455 CRC Press; 2011.
- 456 **He DZZ**, Jia S, Dallos P. Mechano-electrical transduction of adult outer hair cells studied in a gerbil hemic-  
457 ochlea. *Nature*. 2004 Jun; 429(6993):766–770. <http://www.nature.com/doi/10.1038/nature02591>, doi:  
458 10.1038/nature02591.
- 459 **Howard J**, Ashmore JF. Stiffness of sensory hair bundles in the sacculus of the frog. *Hearing research*. 1986;  
460 23(1):93–104.
- 461 **Howard J**, Hudspeth AJ. Mechanical relaxation of the hair bundle mediates adaptation in mechano-electrical  
462 transduction by the bullfrog's saccular hair cell. *Proceedings of the National Academy of Sciences of the*  
463 *United States of America*. 1987 May; 84(9):3064–3068.

- 464 **Howard J**, Hudspeth AJ. Compliance of the hair bundle associated with gating of mechano-electrical transduc-  
465 tion channels in the bullfrog's saccular hair cell. *Neuron*. 1988 May; 1(3):189–199.
- 466 **Hudspeth AJ**. How the ear's works work. *Nature*. 1989 Oct; 341(6241):397–404. doi: 10.1038/341397a0.
- 467 **Hulst HCvd**. Light Scattering by Small Particles. Illustrated edition ed. New York: Dover Publications Inc.; 2003.
- 468 **Indzhukulian AA**, Stepanyan R, Nelina A, Spinelli KJ, Ahmed ZM, Belyantseva IA, Friedman TB, Barr-Gillespie  
469 PG, Frolenkov GI. Molecular remodeling of tip links underlies mechanosensory regeneration in auditory hair  
470 cells. *PLoS biology*. 2013 Jun; 11(6):e1001583. doi: 10.1371/journal.pbio.1001583.
- 471 **Kato H**, Hammar K, Smith PJ, Oldenbourg R. Birefringence imaging directly reveals architectural dynamics  
472 of filamentous actin in living growth cones. *Molecular Biology of the Cell*. 1999 Jan; 10(1):197–210. doi:  
473 10.1091/mbc.10.1.197.
- 474 **Kohls O**, Holst G, Kühl M. Micro-optodes: The role of fibre tip geometry for sensor performance. *SPIE Proc*.  
475 1998 Jun; 3483. doi: 10.1117/12.309651.
- 476 **Kou JI**, Feng J, Ye L, Xu F, Lu Yq. Miniaturized fiber taper reflective interferometer for high temperature mea-  
477 surement. *Optics Express*. 2010 Jun; 18(13):14245–14250. [https://www.osapublishing.org/oe/abstract.cfm?](https://www.osapublishing.org/oe/abstract.cfm?uri=oe-18-13-14245)  
478 [uri=oe-18-13-14245](https://www.osapublishing.org/oe/abstract.cfm?uri=oe-18-13-14245), doi: 10.1364/OE.18.014245.
- 479 **Liao CR**, Hu TY, Wang DN. Optical fiber Fabry-Perot interferometer cavity fabricated by femtosecond laser  
480 micromachining and fusion splicing for refractive index sensing. *Optics Express*. 2012 Sep; 20(20):22813–  
481 22818. <https://www.osapublishing.org/oe/abstract.cfm?uri=oe-20-20-22813>, doi: 10.1364/OE.20.022813.
- 482 **Liberale C**, Cojoc G, Candeloro P, Das G, Gentile F, Angelis FD, Fabrizio ED. Micro-Optics Fabrication on Top of  
483 Optical Fibers Using Two-Photon Lithography. *IEEE Photonics Technology Letters*. 2010 Apr; 22(7):474–476.  
484 doi: 10.1109/LPT.2010.2040986.
- 485 **Martin P**, Bozovic D, Choe Y, Hudspeth AJ. Spontaneous oscillation by hair bundles of the bullfrog's sacculus.  
486 *The Journal of neuroscience: the official journal of the Society for Neuroscience*. 2003 Jun; 23(11):4533–4548.
- 487 **Nam JH**, Peng AW, Ricci AJ. Underestimated Sensitivity of Mammalian Cochlear Hair Cells Due to Splay between  
488 Stereociliary Columns. *Biophysical Journal*. 2015 Jun; 108(11):2633–2647. doi: 10.1016/j.bpj.2015.04.028.
- 489 **Ozcan Le**, Treanton V, Guay F, Kashyap R. Highly Symmetric Optical Fiber Tapers Fabricated With a CO<sub>2</sub> Laser.  
490 *IEEE Photonics Technology Letters*. 2007 May; 19(9):656–658. doi: 10.1109/LPT.2007.894963.
- 491 **Paschotta R**. *Encyclopedia of Laser Physics and Technology*, 2 Volume. Wiley; 2010. [https://www.wiley.com/](https://www.wiley.com/en-gb/Encyclopedia+of+Laser+Physics+and+Technology%2C+2+Volume+Set-p-9783527408283)  
492 [en-gb/Encyclopedia+of+Laser+Physics+and+Technology%2C+2+Volume+Set-p-9783527408283](https://www.wiley.com/en-gb/Encyclopedia+of+Laser+Physics+and+Technology%2C+2+Volume+Set-p-9783527408283).
- 493 **Ricci AJ**, Crawford AC, Fettiplace R. Active hair bundle motion linked to fast transducer adaptation in audi-  
494 tory hair cells. *The Journal of neuroscience: the official journal of the Society for Neuroscience*. 2000 Oct;  
495 20(19):7131–7142.
- 496 **Tobin M**, Chaiyasitdhi A, Michel V, Michalski N, Martin P. Stiffness and tension gradients of the hair cell's tip-link  
497 complex in the mammalian cochlea. *eLife*. 2019; 8. doi: 10.7554/eLife.43473.
- 498 **Wei T**, Han Y, Li Y, Tsai HL, Xiao H. Temperature-insensitive miniaturized fiber inline Fabry-Perot interferometer  
499 for highly sensitive refractive index measurement. *Optics Express*. 2008 Apr; 16(8):5764–5769. [https://www.](https://www.osapublishing.org/oe/abstract.cfm?uri=oe-16-8-5764)  
500 [osapublishing.org/oe/abstract.cfm?uri=oe-16-8-5764](https://www.osapublishing.org/oe/abstract.cfm?uri=oe-16-8-5764), doi: 10.1364/OE.16.005764.
- 501 **Wei T**, Han Y, Tsai HL, Xiao H. Miniaturized fiber inline Fabry-Perot interferometer fabricated with a femtosec-  
502 ond laser. *Optics Letters*. 2008 Mar; 33(6):536–538. [https://www.osapublishing.org/ol/abstract.cfm?uri=](https://www.osapublishing.org/ol/abstract.cfm?uri=ol-33-6-536)  
503 [ol-33-6-536](https://www.osapublishing.org/ol/abstract.cfm?uri=ol-33-6-536), doi: 10.1364/OL.33.000536.
- 504 **Yuan L**, Wei T, Han Q, Wang H, Huang J, Jiang L, Xiao H. Fiber inline Michelson interferometer fabricated by a  
505 femtosecond laser. *Optics Letters*. 2012 Nov; 37(21):4489–4491. [https://www.osapublishing.org/ol/abstract.](https://www.osapublishing.org/ol/abstract.cfm?uri=ol-37-21-4489)  
506 [cfm?uri=ol-37-21-4489](https://www.osapublishing.org/ol/abstract.cfm?uri=ol-37-21-4489), doi: 10.1364/OL.37.004489.
- 507 **Yuan W**, Wang F, Savenko A, Petersen DH, Bang O. Note: Optical fiber milled by focused ion beam and its appli-  
508 cation for Fabry-Pérot refractive index sensor. *The Review of Scientific Instruments*. 2011 Jul; 82(7):076103.  
509 doi: 10.1063/1.3608111.

## 510 Appendix 1

## 511 Experimental configuration

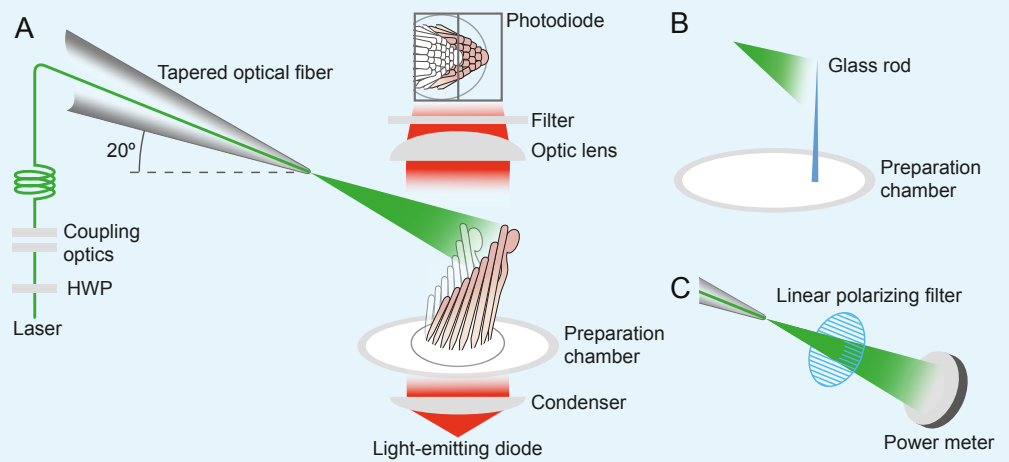

512

513

514

515

516

517

518

519

520

521

522

523

524

525

526

527

**Appendix 1 Figure 1.** Experimental configuration. The schematic drawing shows the arrangement of the main components in the experimental apparatus. (A) The laser beam of 561 nm wavelength (green line) traverses the half-wave plate (HWP) and is coupled to the tapered optical fiber. The fiber's distal end with the microlens is approximated to the experimental preparation under a microscope. Illumination from a light-emitting diode with a central wavelength of 660 nm (red) is focused by a condenser onto a hair bundle, which is imaged onto a dual photodiode with a 60X objective lens of numerical aperture of 1.0. A dichroic mirror blocks 562 nm laser light while it passes the light coming from the light-emitting diode. (B) In control experiments, a glass rod (blue triangle) of stiffness comparable to that of a bullfrog's hair bundle is mounted vertically in the experimental chamber. The laser light (green triangle) deflects the rod, whose motion can be measured with the system in panel A. (C) To orient the plane of polarization of light with the long axis of the stereocilia, light from the tapered optical fiber is passed through a linear polarizing filter and its intensity is measured with a power meter. The maximal power is detected when the polarization plane is aligned with the transmission direction of the polarizing filter.

528

## Deflection of glass rods by photonic force

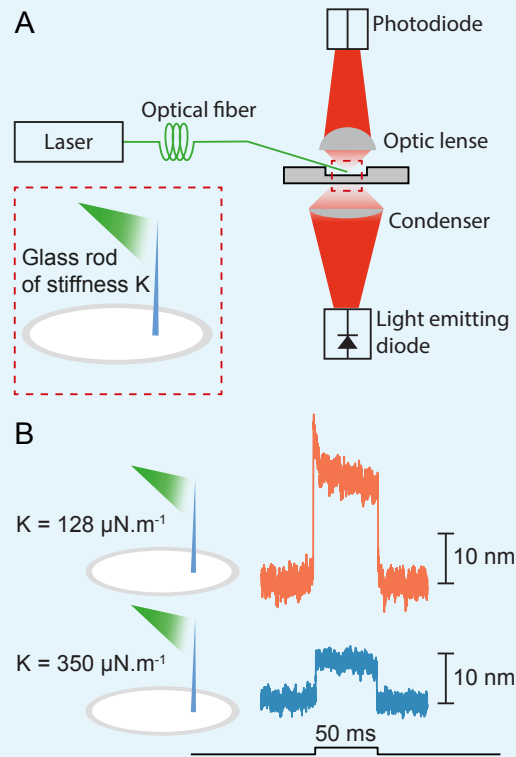

529

530

531

532

533

534

535

536

537

**Appendix 1 Figure 2.** Application of photonic force applied to glass rods. (A) Two glass rods were placed in the experimental chamber and irradiated through a tapered optical fiber for 50 ms. The average of 25 deflections was recorded for each rod. (B) The glass rod with lower stiffness of  $128 \mu\text{N}\cdot\text{m}^{-1}$  (orange) moved thrice as far as the fiber with a higher stiffness of  $350 \mu\text{N}\cdot\text{m}^{-1}$  (blue). The estimated power of irradiation falling upon each rod was 20 mW at a wavelength of 561 nm. The sudden movement at the onset of illumination for the rod of lower stiffness likely stemmed from thermoelastic effects.

538

### Polarization dependence of hair-bundle responses

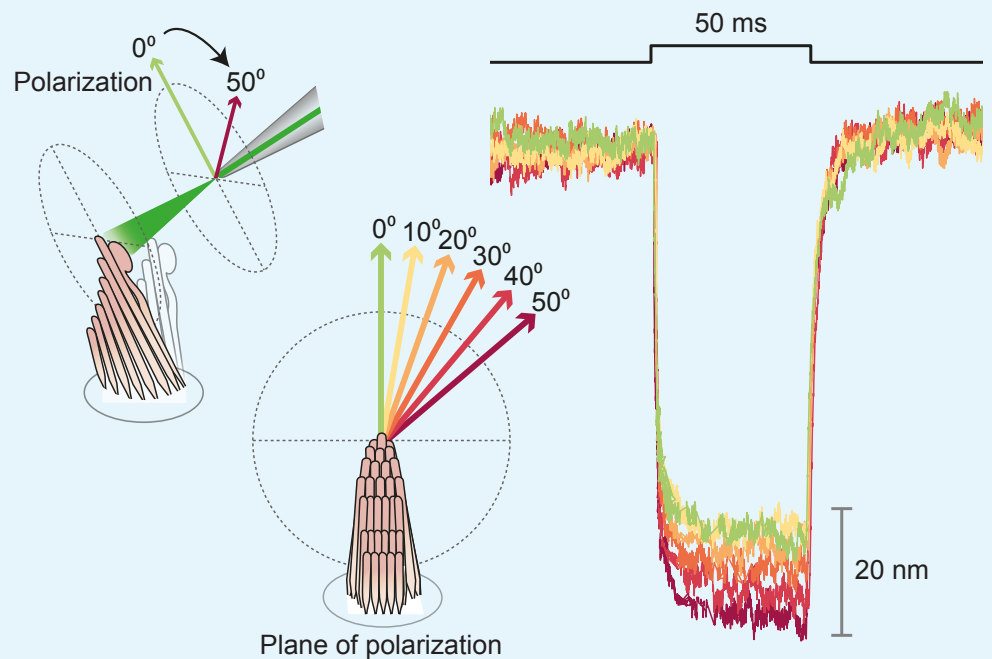

539

540

541

542

543

544

545

546

548

**Appendix 1 Figure 3.** Effect of polarization on response amplitude. After its tip links had been broken by exposure to 5 mM BAPTA for 30 s, a hair bundle from the bullfrog's sacculus was stimulated in the negative direction with 50 ms, 30 mW laser pulses. Using a half-wave plate between the laser and the coupling optics, we rotated the polarization plane about the axis of propagation between 0° and 50°. For a simple polarized object, the reflected power should decline by the cosine of the angle. Although the results showed a qualitative agreement with the prediction, we observed a significantly smaller reduction in amplitude consistent with the fact that stereocilia are birefringent, but exhibit significant scattering of light at all angles. Each trace represents the average of 25 recordings.

549

### Separating the photothermal movement

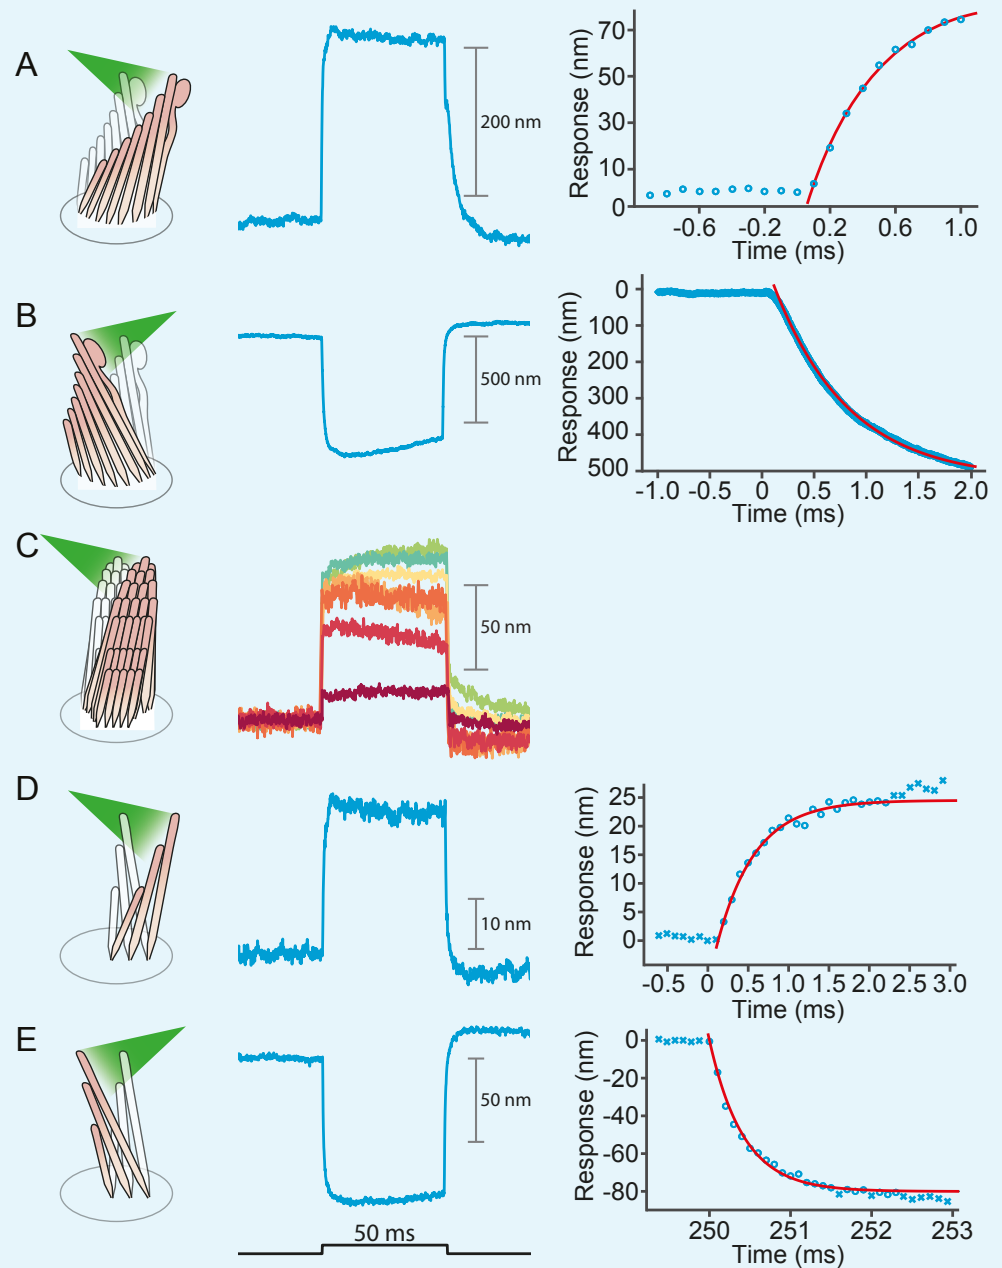

550

551

552

553

554

555

556

557

558

559

560

**Appendix 1 Figure 4.** Deflection of hair bundles by optical radiation force without a photothermal effect. (A) After tip links had been ruptured by a  $\text{Ca}^{2+}$  chelator, photonic force displaced a bullfrog's bundle in the positive direction with a time constant of  $415 \mu\text{s}$ . In this and the other panels, the bundles were stimulated at  $561 \text{ nm}$  with  $30 \text{ mW}$  of input power and the records represent the average of 25 repetitions. (B) Stimulation in the negative direction evoked a negative movement with a time constant of  $750 \mu\text{s}$ . (C) Photonic force applied at  $90^\circ$  to the axis of sensitivity displaced a hair bundle in the direction of irradiation. (D) After the disruption of tip links, the hair bundle from a rat's outer hair cell moved with a time constant of  $467 \mu\text{s}$  in the direction of photonic stimulation. (E) Negatively directed stimulation conversely evoked motion with a time constant of  $418 \mu\text{s}$  in the negative direction.
